# Supplementary material for: Biosynthesized ZnO-NPs from Morus indica Attenuates Methylglyoxal-Induced Protein Glycation and RBC Damage: In-Vitro, In-Vivo and Molecular Docking Study
Source: PubMed Central journal article supplement (PMC6995520; doi:10.3390/biom9120882), 2019-12-16
Supplement: biomolecules-09-00882-s001.pdf [file biomolecules-09-00882-s001.pdf]

Supplementary Materials

# Biosynthesized ZnO-NPs from *Morus indica* Attenuates Methylglyoxal-Induced Protein Glycation and RBC Damage: In-Vitro, In-Vivo and Molecular Docking Study

Satish Anandan <sup>1</sup>, Murali Mahadevamurthy <sup>2</sup>, Mohammad Azam Ansari <sup>3</sup>, Mohammad A. Alzohairy <sup>4</sup>, Mohammad N. Alomary <sup>5</sup>, Syeda Farha Siraj <sup>1</sup>, Sarjan Halugudde Nagaraja <sup>6</sup>, Mahendra Chikkamadaiah <sup>2</sup>, Lakshmeesha Thimappa Ramachandrappa <sup>7</sup>, Hemanth Kumar Naguvanahalli Krishnappa <sup>2</sup>, Ana E. Ledesma <sup>8</sup>, Amruthesh Kestur Nagaraj <sup>2</sup> and Asna Urooj <sup>1,\*</sup>

<sup>1</sup> Department of Studies in Food Science and Nutrition, University of Mysore, Manasagangotri, Mysuru, Karnataka 570006, India

<sup>2</sup> Applied Plant Pathology Laboratory, Department of Studies in Botany, University of Mysore, Manasagangotri, Mysuru, Karnataka 570006, India

<sup>3</sup> Department of Epidemic Disease Research, Institute for Research & Medical Consultations (IRMC), Imam Abdulrahman Bin Faisal University, P.O. Box 1982, Dammam 31441, Saudi Arabia

<sup>4</sup> Department of Medical Laboratories, College of Applied Medical Sciences, Qassim University, Qassim 51431, Saudi Arabia

<sup>5</sup> National Center for Biotechnology, Life Science and Environmental Research Institute, King Abdulaziz City for Science and Technology, P.O. Box 6086, Riyadh, Saudi Arabia

<sup>6</sup> Department of Studies in Zoology, University of Mysore, Manasagangotri, Mysuru, Karnataka 570006, India

<sup>7</sup> Department of Studies in Biotechnology, University of Mysore, Manasagangotri, Mysuru, Karnataka 570006, India

<sup>8</sup> Centro De Investigación en Biofísica Aplicada y Alimentos, Universidad Nacional de Santiago del Estero (CIBAAL-UNSE-CONICET), FCEyT, RN 9, km 1125, CP 4206 Santiago del Estero, Argentina

\* Correspondence: asnaurooj@foodsci.uni-mysore.ac.in

**Table S1.** Hemoglobin- $\delta$ -Gluconolactone ( $\delta$ -Glu) assay.

| Treatments                                     |        | Inhibition of HbA1c (%)       |
|------------------------------------------------|--------|-------------------------------|
| Hb + $\delta$ -Gluconolactone + AG             |        | 45.89 $\pm$ 1.14 <sup>a</sup> |
| Hb + $\delta$ -Gluconolactone + ZnO-NPs        | 1 mg   | 1.81 $\pm$ 0.87 <sup>d</sup>  |
|                                                | 2.5 mg | 13.97 $\pm$ 1.30 <sup>c</sup> |
|                                                | 5 mg   | 26.54 $\pm$ 1.21 <sup>b</sup> |
| Hb+ $\delta$ -Gluconolactone + Zinc Nanopowder | 1 mg   | 0.27 $\pm$ 0.48 <sup>d</sup>  |
|                                                | 2.5 mg | 0.53 $\pm$ 0.86 <sup>d</sup>  |
|                                                | 5 mg   | 1.13 $\pm$ 0.97 <sup>d</sup>  |

Values are means of three independent replicates ( $n = 3$ ) and  $\pm$  indicate standard errors. Means followed by the same letter(s) within the same column are not significantly ( $p < 0.05$ ) different according to Tukey's HSD.

**Table S2.** Inhibitory effect of biosynthesized ZnO-NPs from *M. indica* on protein glycation.

| Treatments                  | Relative Intensity (a.u.)    |                               |
|-----------------------------|------------------------------|-------------------------------|
|                             | Fluorescence of Total AGEs   | Fluorescence of Argpyrimidine |
| BSA                         | 508.66 ± 8.15 <sup>e</sup>   | 312.15 ± 4.13 <sup>s</sup>    |
| BSA + MGO                   | 1945.70 ± 38.08 <sup>a</sup> | 981.50 ± 7.07 <sup>a</sup>    |
| BSA + MGO + AG              | 569.90 ± 7.24 <sup>e</sup>   | 365.23 ± 7.22 <sup>f</sup>    |
| BSA + MGO + ZnO-NPs         | 1 mg                         | 1616.90 ± 13.89 <sup>c</sup>  |
|                             | 2.5 mg                       | 1369.70 ± 14.55 <sup>d</sup>  |
|                             | 5 mg                         | 1152.30 ± 37.42 <sup>d</sup>  |
| BSA + MGO + Zinc Nanopowder | 1 mg                         | 1838.00 ± 35.89 <sup>b</sup>  |
|                             | 2.5 mg                       | 1806.60 ± 52.02 <sup>b</sup>  |
|                             | 5 mg                         | 1795.10 ± 62.02 <sup>b</sup>  |

Values are means of three independent replicates ( $n = 3$ ) and  $\pm$  indicate standard errors. Means followed by the same letter(s) within the same column are not significantly ( $p < 0.05$ ) different according to Tukey's HSD.

**Table S3.** N-Acetylglucyl-lysine methyl ester (G.K.) peptide mediated ribose glycation with and without treatment.

| Treatments                     | Relative Intensity (a.u.)  |
|--------------------------------|----------------------------|
| GKP + Ribose                   | 743.19 ± 8.91 <sup>a</sup> |
| GKP + Ribose + AG              | 290.41 ± 7.42 <sup>d</sup> |
| GKP + Ribose + ZnO-NPs         | 398.41 ± 7.34 <sup>c</sup> |
| GKP + Ribose + Zinc Nanopowder | 693.16 ± 8.94 <sup>b</sup> |

Values are means of three independent replicates ( $n = 3$ ) and  $\pm$  indicate standard errors. Means followed by the same letter(s) within the same column are not significantly ( $p < 0.05$ ) different according to Tukey's HSD.
